1 **TITLE**

2 Genomic adaptation in the CAZyme and specialised metabolism of the plant-associated *Streptomyces*  
3 *violaceusniger* clade

4 **AUTHORS**

5 Gayrard D.<sup>1,2</sup>, Veyssi re M.<sup>1</sup>, Adam K.<sup>1</sup>, Martinez Y.<sup>3</sup>, Vandecasteele C.<sup>4</sup>, Vidal M.<sup>4</sup>, Dumas B.<sup>1\*</sup>, Rey T.<sup>1,2\*</sup>

6 **CORRESPONDING AUTHOR’S EMAIL**

7 [reyt@desangosse.com](mailto:reyt@desangosse.com) and [dumas@lrsv.ups-tlse.fr](mailto:dumas@lrsv.ups-tlse.fr)

8 **AFFILIATIONS**

9 <sup>1</sup>Laboratoire de Recherche en Sciences V g tales, Universit  de Toulouse, CNRS, UPS, Toulouse INP,  
10 Auzeville-Tolosane, France

11 <sup>2</sup>De Sangosse, Bonnel, Pont-Du-Casse, France

12 <sup>3</sup>CNRS, Plateforme Imagerie-Microscopie, F d ration de Recherche FR3450, Castanet-Tolosan, France

13 <sup>4</sup>INRAE, US 1426, GeT-PlaGe, Genotoul, Castanet-Tolosan, France

14 \*corresponding authors

15

16

17

18

19

20

21

22 **ABSTRACT**

23 Streptomyces are Gram-positive actinobacteria largely represented in the plant root microbiota.  
24 The genetic determinants involved in the presence of *Streptomyces* in the rhizosphere are largely  
25 unknown and can rely on the ability to degrade plant-derived compounds such as cell-wall  
26 polysaccharides and on the production of specialised metabolites. To address whether *Streptomyces*  
27 strains recruited into root microbiota share genomic specificities related to these two functions, we  
28 engaged a comparative genomic analysis using a newly sequenced rhizospheric strain, *Streptomyces*  
29 sp. AgN23 and strains from the phylogenetically related *S. violaceusniger* clade. This analysis  
30 enlightens a shared prominent CAZyme potentially involved in plant polysaccharides degradation  
31 and a strong conservation of antimicrobials biosynthetic clusters (rustmicin, mediomycin, niphimycin,  
32 nigericin) as well as plant bioactive compounds (nigericin, echosides, elaiophylin). Taken together, our  
33 work supports the hypothesis that specific hydrolytic enzymes and specialised metabolites repertoires  
34 may play important roles in the development of *Streptomyces* strains in the rhizosphere.

35 **KEYWORDS**

36 *Streptomyces*, Long-read sequencing, Biosynthetic Gene Clusters, Phylogenomic, Specialised  
37 Metabolites, Transcriptome

38

39

## 40 INTRODUCTION

41 Streptomycetes are aerobic and Gram-positive actinobacteria forming branched vegetative mycelium  
42 before developing aerial hyphae bearing spores<sup>1</sup>. These bacteria received considerable attention from  
43 a biotechnological point of view, notably regarding their enzymatic repertoire<sup>2</sup> and in the drug  
44 discovery field, leading to the structure elucidation of more than 6000 specialised metabolites<sup>3,4</sup>. Their  
45 tremendous ability to produce antimicrobial compounds relies on the wealth and diversity of  
46 Biosynthetic Gene Clusters (BGCs) encoded in their genomes<sup>5</sup>. The recent soaring of microbial  
47 metabarcoding approaches have highlighted *Streptomyces* spp. prominent abundance in plant roots  
48 microbiota<sup>6,7</sup>. Since several of these metabolites display strong antimicrobial activities, *Streptomyces*  
49 recruitment in the rhizosphere and inside root tissues presumably protect the host from pathogens.  
50 Thus, several *Streptomyces* based products have been developed for agriculture, but these strains only  
51 cover a subset of plant colonising *Streptomyces* species<sup>8,9</sup>. Notwithstanding, little is known regarding  
52 the biological function of these bacteria in the plant environment and the gene families involved in  
53 their adaptation to this ecological niche<sup>10,11</sup>. More than 100 hundred fully assembled genome  
54 sequences of *Streptomyces* strains are currently available, paving the way to whole genome-based  
55 phylogeny and comparisons of BGCs content across *Streptomyces* clades<sup>12-14</sup>. This knowledge open  
56 inroads to rationalise and investigate the potential use of *Streptomyces* strains in agriculture.  
57 Here we report a gapless assembly of *Streptomyces* sp. AgN23 (AgN23), previously isolated from  
58 grapevine rhizosphere and identified as a strong inducer of plant defences<sup>15</sup>. We used this high-quality  
59 assembly to position AgN23 in the *Streptomyces violaceusniger* genomospecies. We then dissected  
60 the original features in the CAZyme and BGC content of AgN23 and other *Streptomyces*  
61 *violaceusniger* strains and shed light on specificities in the specialised metabolism and carbohydrate  
62 degradation capabilities of this lineage. Our data reflect the high potential of *Streptomyces* species of  
63 the *S. violaceusniger* clade to interact with plants and protect them from fungal pathogens.

64

## 65 RESULTS AND DISCUSSION

### 66 Chromosome scale assembly of AgN23 and genome based taxonomic assignment to the *S.* 67 *violaceusniger* clade

68 We performed a PacBio® RSII long-read sequencing and obtained a linear chromosome of 10,86 Mb  
69 for AgN23. This genome sequence was polished using Illumina® MiSeq sequences to produce the final  
70 assembly. The final assembly was uploaded on the MicroScope Platform<sup>16</sup>. The genome annotation  
71 retrieved 10,514 protein coding sequences, 10,458 of them being supported by RNA-seq  
72 (Supplementary Information 1). checkM analysis was performed using 455 genomes and 315 lineage-  
73 specific markers and validated the completeness of the assembly and the annotation<sup>17</sup>. Moreover, its  
74 completeness was also supported by BUSCO analysis<sup>18</sup>.

75 **Table 1: Summary of the assembly and the annotation of *Streptomyces* sp. AgN23 complete**  
76 **chromosome obtained by PacBio® and Illumina® sequencing.**

| Assembly Statistics            | <i>Streptomyces</i> sp. AgN23 |
|--------------------------------|-------------------------------|
| Genome size (bp)               | 10 858 739                    |
| Coverage (PacBio®)             | 77X                           |
| G+C content (%)                | 70.9                          |
| Number of protein coding genes | 10,514                        |
| CheckM Completeness            | 100%                          |
| Contamination                  | 1,84%                         |
| BUSCO                          | 451/452                       |
| CAZymes                        | 278                           |
| Number BGCs (antiSMASH 5.0)    | 45                            |

77  
78 More than 500 *Streptomyces* species have been described based on their 16S rRNA sequence. Previous  
79 sequencing of AgN23 16S rRNA showed strongest conservation with representatives of the *S.*  
80 *violaceusniger* clade, most notably *S. castelarensis*<sup>15</sup>. However, lack of variation in 16S rRNA may  
81 confound strains belonging to different species<sup>19</sup>. Recent development of long-read technologies and  
82 massive sequencing of *Streptomyces* has leveraged whole genome based phylogenies<sup>5</sup>. Thus, we  
83 decided to consolidate the taxonomic affiliation of AgN23 with the gapless assembly of AgN23  
84 chromosome. We performed an autoMLST approach based on publicly available *Streptomyces*  
85 sequences. In brief, 63 conserved housekeeping genes showing neutral dN/dS were concatenated and

86 aligned as a basis for tree building (Figure 1)<sup>20</sup>. As a result, using AgN23 as query, we affiliated the  
 87 strain to a clade containing three other stains showing Average Nucleotide Identity higher than 95%  
 88 with AgN23 which can thus be considered as belonging to the same species, namely *S.*  
 89 *melanosporofaciens*, *S. antimycoticus*<sup>21,22</sup> and *S. violaceusniger* NRRL F-8817. In total, 24 isolates  
 90 harboured ANI>85% (Supplementary Information 2).

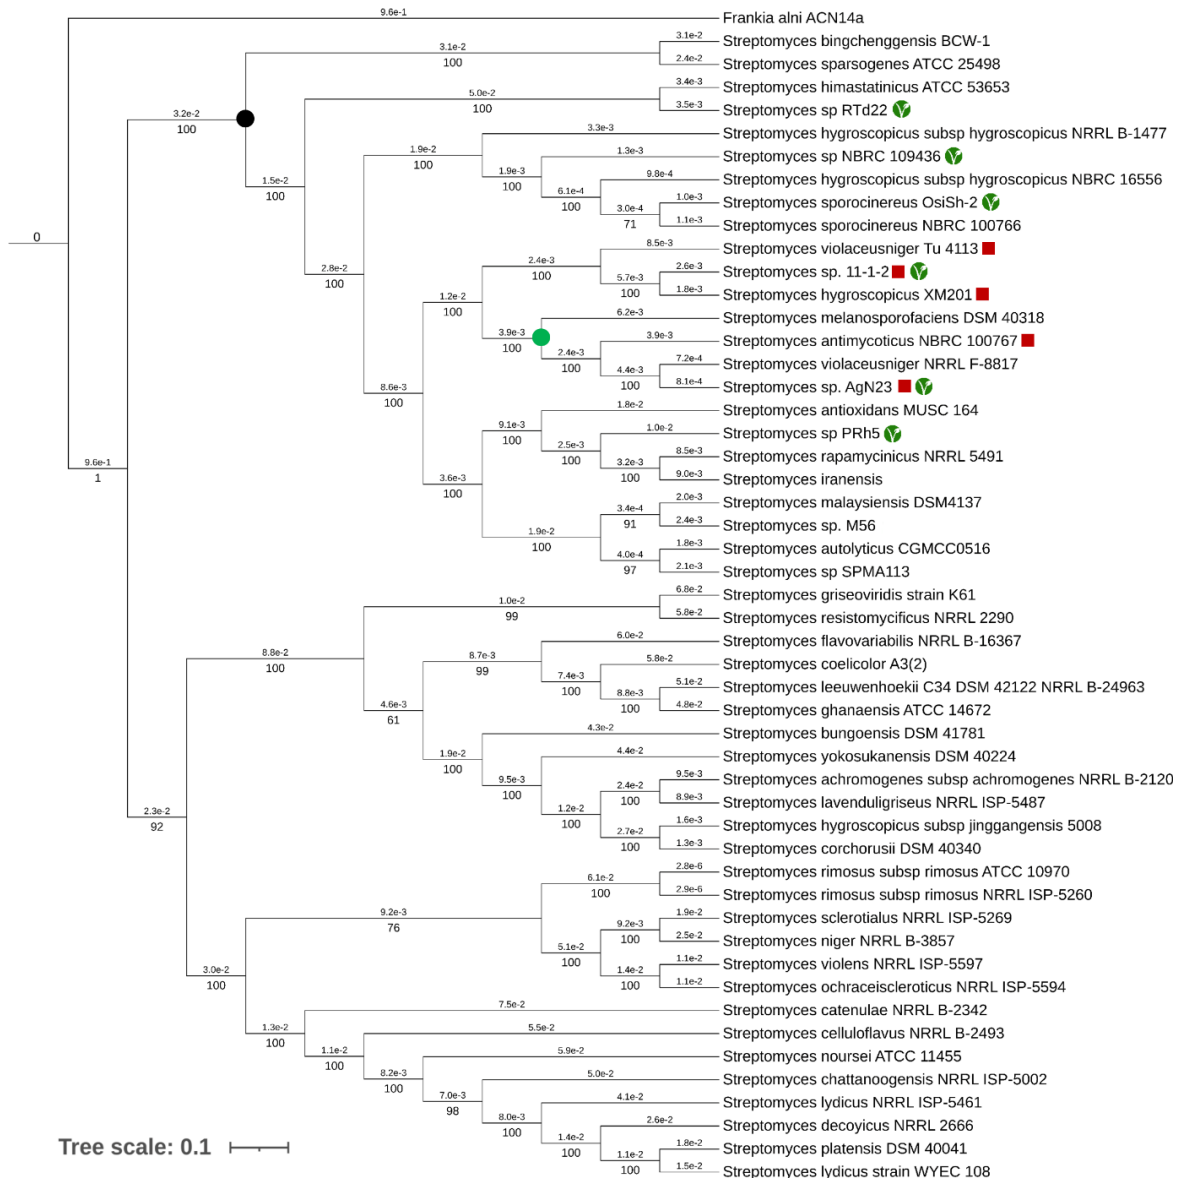

91

92 **Figure 1: Multi Locus Sequence Typing assigned AgN23 to the *S. violaceusniger* clade.** Phylogenetic  
 93 tree based on genomic sequences with AutoMLST. The green node highlights the isolates considered  
 94 to be from the same species (ANI>95%). The black node highlights the clade formed by isolates with  
 95 ANI>85% as compared to AgN23. The red squares highlighted the five strains that were used for the  
 96 BGC conservation study. The green logo indicates plant-isolated strains. *Frankia alni* ACN14a was used  
 97 as outgroup, bootstrap=100.

98 This group of AgN23-related strains contains hallmark representative of the *S. violaceusniger* clade,  
99 such as, *S. hygrosopicus*, *S. sparsogenes*, *S. malaysiensis* <sup>23</sup>, *S. himastatinicus*, *S. rapamycinicus*, and  
100 other close species *S. autolyticus* <sup>24</sup>, *S. antioxidans* <sup>25</sup> and *S. iranensis* <sup>26</sup>. Interestingly, *Streptomyces*  
101 strains RT-d22 <sup>27</sup>, *Streptomyces* sp. Strain PRh5 <sup>28</sup>, *Streptomyces* sp. 11-1-2 <sup>29</sup>, *S. hygrosopicus* Osish-  
102 2 <sup>30-34</sup> and *Streptomyces* sp. NBRC 109436 <sup>35</sup> were isolated from the rhizosphere of diverse plants  
103 across the world. It suggests that interaction with plants is widespread among the strains belonging  
104 to the *S. violaceusniger* clade. Finally, cultivation of AgN23 on a range of ISP media confirmed that  
105 AgN23 display typical phenotypes of *S. violaceusniger* clade with whitish colony then turning grey  
106 during the sporulation process and resulting in the formation of spiralled chains of rugose-ornamented  
107 spores (Figure 2) <sup>36-38</sup>.

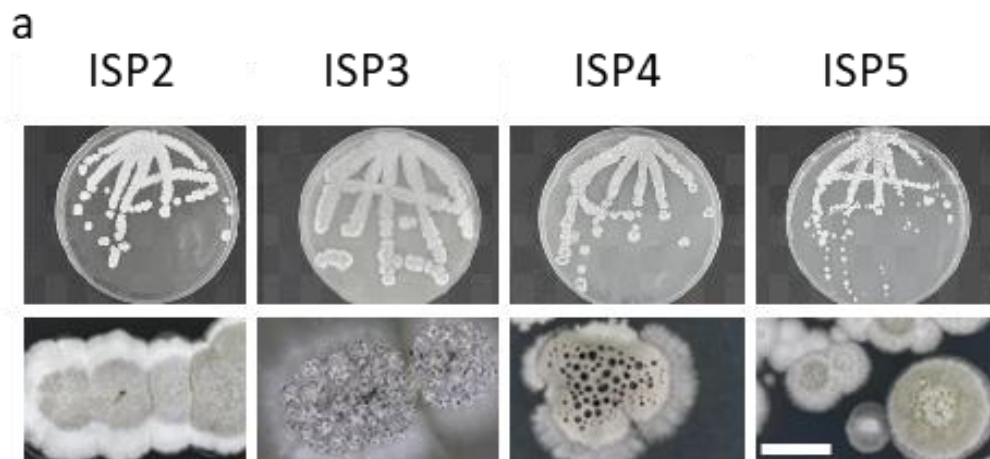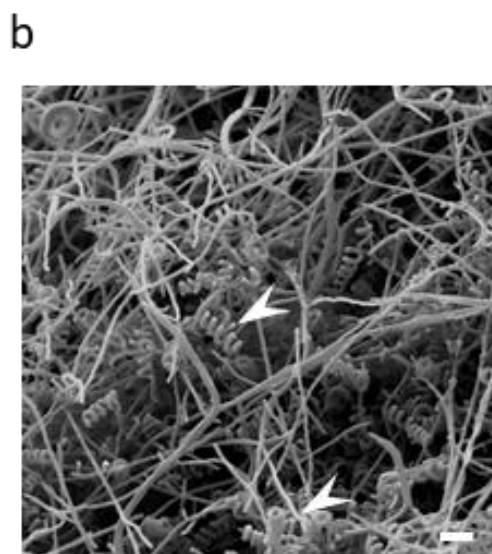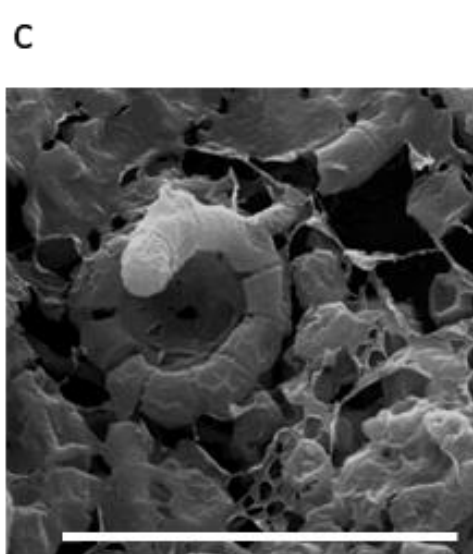

109 **Figure 2: AgN23 harbours typical phenotypic features the *S. violaceusniger* clade.** a) AgN23 forms a  
110 white mycelium turning grey at the onset of sporulation is observed on a range of ISP media, the Petri  
111 plate are 9 cm in diameter and the scale bar is 1mm. b) Scanning Electron Microscopy observation of  
112 spiralled chains of spores (white arrow) are formed by AgN23 (scale bar = 6µm). c) Scanning Electron  
113 Microscopy observation of AgN23 spores showing a rugose-ornamented surface (scale bar = 6µm).

114

## 115 **AgN23 exhibits a wide repertoire of CAZymes related to plant and fungi cell wall degradation**

116 Streptomycetes display extensive abilities to degrade polysaccharides based on their rich repertoires  
117 of Carbohydrate-Active Enzymes (CAZymes) <sup>2,39</sup>. CAZymes may represent a major advantage to get  
118 access to carbon sources derived from plant cell wall in the rhizosphere. We predicted AgN23 and four  
119 others *S. violaceusniger* sp. CAZymes with dbCAN2 to detect potential CAZyme adaptation to plant  
120 cell walls. The CAZyme of the hydrolytic strain *Streptomyces* sp. SirexAA-E <sup>2</sup>, the model strain *S.*  
121 *coelicolor* A3(2) and four strains belonging to the *S. violaceusniger* clade, namely *S. antimycoticus*  
122 NBRC 100767, *Streptomyces* sp. 11-1-2, *S. hygroscopicus* XM201 and *S. violaceusniger* Tü 4113 were  
123 annotated for comparison with AgN23. Noteworthy, the selection of *S. violaceusniger* strains was  
124 based on two criterions, the availability of a chromosome scale assembly and an ANI score higher than  
125 90% with AgN23. Around 2.8% of AgN23 coding sequences were annotated by dbCAN2 as CAZymes  
126 (Supplementary Information 3). Such large repertoire of CAZymes has been previously described in  
127 the *Streptomyces* sp. SirexAA-E as a marker for high potential hydrolytic *Streptomyces* strains, notably  
128 cellulose <sup>2</sup>. Most of these enzymes are predicted to degrade major plant cell wall components,  
129 cellulose, hemicellulose and pectin, as well as cutin, a waxy polymer of the plant cuticle (Figure 3). We  
130 found that AgN23 and the other *S. violaceusniger* sp. possess Polysaccharide Lyase PL1 and PL9  
131 involved in pectin degradation which are absent from *S. coelicolor* or *Streptomyces* sp. SirexAA-E.  
132 Endoglucanases related to cellulose degradation, namely AA3 (Auxilliary Activity) and GH6 (Glycoside  
133 Hydrolase) families are expanded in AgN23 and its related strains as compared to the two outgroup.  
134 A similar observation was drawn for the CE1 (Carbohydrate Esterase) and GH43 involved in  
135 Hemicellulose catabolism. Strikingly, AgN23 genome encode 9 GH43 whilst the other *S. violaceusniger*  
136 sp. all possess a single copy gene and the 2 outgroups none. Finally, cutins degradation mediated by



137 AA6 CAZymes is shared by *S. violaceusniger* sp. but not found in *S. coelicolor*. The expression level of  
 138 all these CAZymes vary between Log<sub>2</sub>=8 and Log<sub>2</sub>=17 read counts in pure culture, suggesting that  
 139 AgN23 constitutively express this prominent CAZyme (Figure 3). Noteworthy, the most expressed  
 140 CAZymes families in AgN23 are AA3, CE1 both families being expanded in *S. violaceusniger* sp. Taken  
 141 together, these data illustrate the strong potential of AgN23 to use polysaccharides derived from plant  
 142 biomass as nutrient source in the rhizosphere niche.

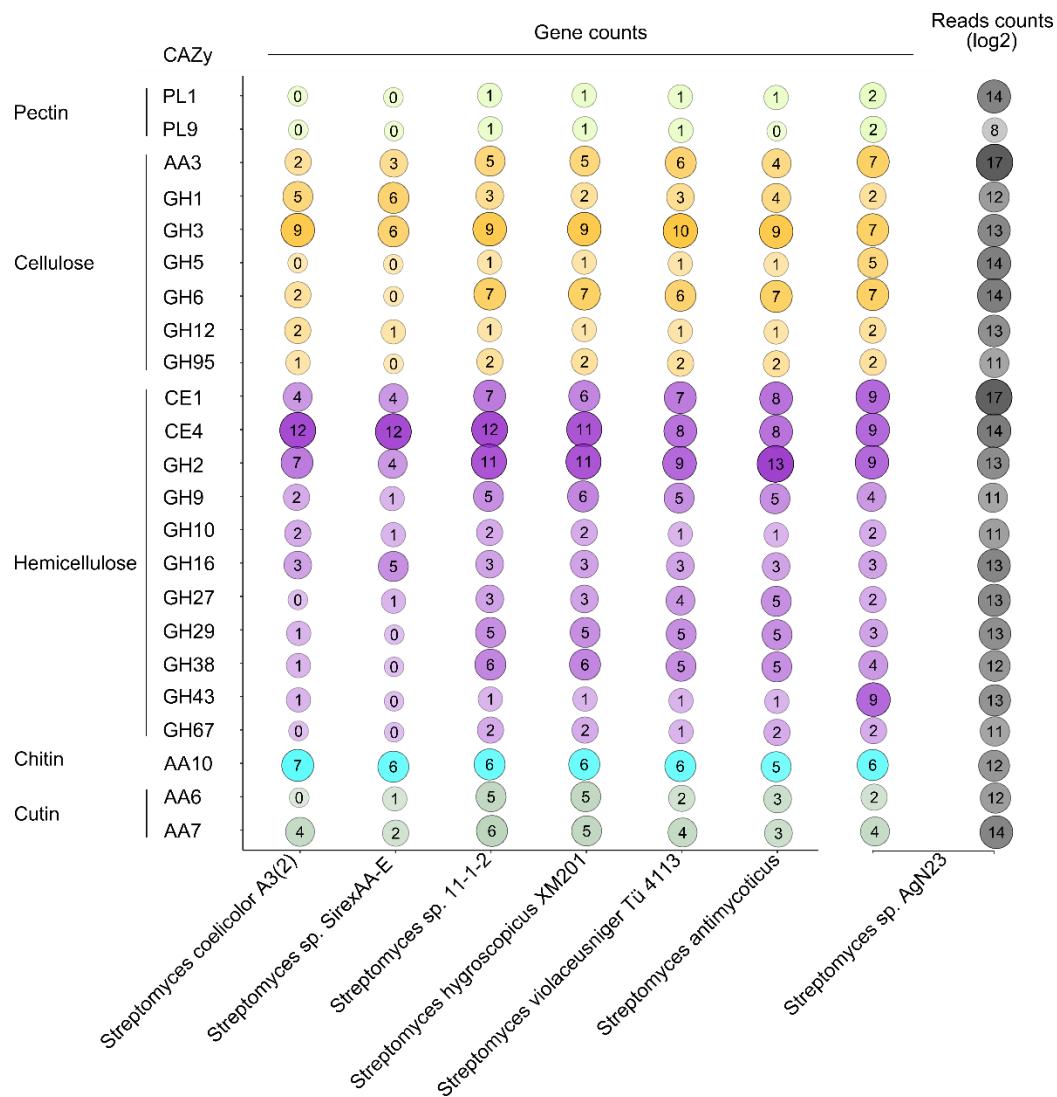

143

144 **Figure 3: Plant cell wall associated CAZyme is expanded in *S. violaceusniger* sp. as compared to *S.***  
 145 ***coelicolor* and *S. SirexAA-E*.** CAZymes families with at least 2 representatives in AgN23 are ordered  
 146 according to their target polymers and the type of enzymatic activity: Glycoside Hydrolases (GHs),  
 147 Polysaccharide Lyases (PLs), Carbohydrate Esterases (CEs) and Auxiliary Activities (AAs). The  
 148 transcription of AgN23 CAZyme is displayed as sums of genes mean read counts for each family on a  
 149 Log<sub>2</sub> base (n=3).



150 **Specialised metabolism of AgN23 may interfere with plants physiology and their microbiota**

151 Specialised metabolites are presumed to play key roles in adaption of streptomycetes to their  
152 environment. We used antiSMASH 5.0 to detect and annotate AgN23 BGCs according to their similarity  
153 to reference clusters deposited in the MiBIG database <sup>40,41</sup>. Forty-Five BGCs were detected in the  
154 AgN23 genome, all of them being expressed during AgN23 cultivation according to RNA-seq analysis  
155 (Table 2, Supplementary information 4). Their expression levels range from Log<sub>2</sub>=7 up to Log<sub>2</sub>=15  
156 reads counts for their central biosynthetic genes as defined by antiSMASH. Twenty BGCs of AgN23  
157 showed at least 50% of similar gene content with MiBIG reference BGCs (Table 2). These candidates  
158 BGCs are notably involved in the biosynthesis of volatiles terpenes including geosmin (region 3, 10,  
159 23), indoles (region 21), bacteriocins (region 5 and 20) and a bicyclomycin-like antibacterial (region  
160 43). Other BGCs are potentially involved in the production of siderophores including coelichelin and  
161 desferrioxamin (region 24, 27, 42) or stress protectant (ectoin, region 16). Additional BGCs are likely  
162 involved in the regulation of the bacteria lifecycle such as spore pigment (region 30), hopene (region  
163 31), and butyrolactone (region 36). BGCs encoded by regions 2, 18, 39 and 40 are similar to the  
164 biosynthesis pathways of the antifungal compounds rustmicin, also known as galbonolide A,  
165 mediomycin A, nigericin and niphimycins C-E respectively <sup>42-45</sup>. In addition, echoside (region 26),  
166 elaiophylin (region 38) and nigericin (region 39) are structural analogues of terfestatin, pteridic acid  
167 and monensin respectively, three compounds affecting plant immunity and development <sup>46-50</sup>. Taken  
168 together, these data reveal that AgN23 likely secrete specialised metabolites with a potential to  
169 regulate host plant biology along with its rhizosphere microbiota.

170

171

172 **Table 2: antiSMASH annotation of AgN23 chromosomal regions coding for Biosynthetic Gene**  
173 **Clusters.** The functional category of each BGCs was determined by antiSMASH. The BGC type, best hit  
174 in the MiBIG database as its percentage of similarity to the query are indicated along with the bacterial  
175 strain from whom the cluster was described. The expression level of each BGCs was determined by  
176 doing the mean of the reads count of the core biosynthetic genes of each BGC from the RNA-seq data,  
177 the result is expressed on a Log<sub>2</sub> base.

| Region | BGC type                        | Putative compound (MiBIG similarity score)          | MiBIG accession | Species                                | Mean reads counts (Log2) |
|--------|---------------------------------|-----------------------------------------------------|-----------------|----------------------------------------|--------------------------|
| 1      | NRPS                            | atratumycin (7%)                                    | BGC0001975      | <i>S. atratus</i>                      | 10                       |
| 2      | PKS-like,terpene                | rustmicin (20%)                                     | BGC0000065      | <i>S. galbus KCCM 41354</i>            | 10                       |
| 3      | terpene                         | tiancilactone (17%)                                 | BGC0002019      | <i>Streptomyces sp. CB03234</i>        | 9                        |
| 4      | NRPS                            | decholorcuracomycin (8%)                            | BGC0001569      | <i>S. noursei ATCC 11455</i>           | 12                       |
| 5      | bacteriocin                     |                                                     |                 |                                        | 9                        |
| 6      | T1PKS, hglE-KS                  | leinamycin (2%)                                     | BGC0001101      | <i>S. atroolivaceus</i>                | 11                       |
| 7      | NRPS                            |                                                     |                 |                                        | 8                        |
| 8      | T1PKS, NRPS                     | meridamycin (52%)                                   | BGC0001011      | <i>Streptomyces sp. NRRL</i>           | 9                        |
| 9      | terpene                         | 2-methylisoborneol (100%)                           | BGC0000658      | <i>S. griseus NBRC 13350</i>           | 7                        |
| 10     | terpene                         | pristinol (100%)                                    | BGC0001746      | <i>S. pristinaespiralis ATCC</i>       | 8                        |
| 11     | NRPS-like, T1PKS                | amipurimycin (90%)                                  | BGC0001957      | <i>S. novoguineensis</i>               | 12                       |
| 12     | T1PKS, T3PKS, NRPS, betalactone | totopotensamide (43%)                               | BGC0001807      | <i>Streptomyces pactum SCSIO 02999</i> | 9                        |
| 13     | lanthipeptide                   | lipopolysaccharide (8%)                             | BGC0000774      | <i>Xanthomonas campestris</i>          | 9                        |
| 14     | NRPS                            | mildiomyacin (11%)                                  | BGC0000882      | <i>S. rimofaciens strain</i>           | 9                        |
| 15     | T1PKS, siderophore              | apoptolidin (23%)                                   | BGC0000021      | <i>Nocardioopsis sp. FU 40</i>         | 9                        |
| 16     | ectoine                         | ectoine (100%)                                      | BGC0000853      | <i>Streptomyces anulatus</i>           | 10                       |
| 17     | terpene                         |                                                     |                 |                                        | 13                       |
| 18     | T1PKS                           | mediomyacin A (88%)                                 | BGC0001932      | <i>Kitasatospora medicidica</i>        | 12                       |
| 19     | ladderane                       | atratumycin (31%)                                   | BGC0001975      | <i>S. atratus</i>                      | 11                       |
| 20     | NRPS                            | ochronotic pigment (75%)                            | BGC0000918      | <i>S. avermitilis</i>                  | 11                       |
| 21     | indole                          | 5-isoprenylindole-3-carboxylate $\beta$ -D-glycosyl | BGC0001483      | <i>Streptomyces sp. RM-5-8</i>         | 10                       |
| 22     | NRPS, arylpolyene, ladderane    | RP-1776 (46%)                                       | BGC0000429      | <i>Streptomyces sp. Acta 2897</i>      | 11                       |
| 23     | terpene                         | geosmin (100%)                                      | BGC0001181      | <i>S. coelicolor A3(2)</i>             | 12                       |
| 24     | siderophore                     | desferrioxamin B (100%)                             | BGC0000941      | <i>S. griseus NBRC 13350</i>           | 10                       |
| 25     | terpene                         | carotenoid (63%)                                    | BGC0000633      | <i>S. avermitilis</i>                  | 15                       |
| 26     | NRPS-like                       | echosides (100%)                                    | BGC0000340      | <i>Streptomyces sp. LZ35</i>           | 12                       |
| 27     | siderophore                     |                                                     |                 |                                        | 8                        |
| 28     | bacteriocin                     |                                                     |                 |                                        | 12                       |
| 29     | NRPS                            | formicamycins A-M (20%)                             | BGC0001590      | <i>Streptomyces sp. KY5</i>            | 13                       |
| 30     | T2PKS                           | spore pigment (83%)                                 | BGC0000271      | <i>S. avermitilis</i>                  | 13                       |
| 31     | terpene                         | hopene (76%)                                        | BGC0000663      | <i>S. coelicolor A3(2)</i>             | 10                       |
| 32     | lanthipeptide                   | steffimycin D (16%)                                 | BGC0000273      | <i>S. steffisburgensis</i>             | 10                       |
| 33     | other                           | mitomycin (18%)                                     | BGC0000915      | <i>S. lavendulae</i>                   | 10                       |
| 34     | NRPS                            | cadaside (14%)                                      | BGC0001968      | <i>Uncultured bacterium</i>            | 9                        |
| 35     | T1PKS                           |                                                     |                 |                                        | 10                       |
| 36     | butyrolactone                   |                                                     |                 |                                        | 11                       |
| 37     | hserlactone                     | daptomycin (3%)                                     | BGC0000336      | <i>S. filamentosus NRRL 11379</i>      | 11                       |
| 38     | T1PKS                           | elaiophylin (87%)                                   | BGC0000053      | <i>Unknown</i>                         | 11                       |
| 39     | T1PKS                           | nigericin (100%)                                    | BGC0000114      | <i>S. violaceusniger</i>               | 10                       |
| 40     | T1PKS                           | niphimycins C-E (87%)                               | BGC0001700      | <i>Streptomyces sp. IMB7-145</i>       | 10                       |
| 41     | NRPS-like                       | BD-12 (67%)                                         | BGC0001379      | <i>S. luteocolor</i>                   | 10                       |
| 42     | NRPS                            | coelichelin (90%)                                   | BGC0000325      | <i>S. coelicolor A3(2)</i>             | 10                       |
| 43     | CDPS                            | bicyclomycin (100%)                                 | BGC0001468      | <i>S. cinnamoneus</i>                  | 10                       |
| 44     | betalactone                     |                                                     |                 |                                        | 9                        |
| 45     | NRPS                            | acyldepsipeptide (10%)                              | BGC0001967      | <i>S. hawaiiensis</i>                  | 9                        |

178

179

180 **A core set of biosynthetic gene clusters conserved across *S. violaceusniger* species**

181 The *S. violaceusniger* clade hosts several strains possessing BGCs involved in the synthesis of fungicidal  
182 polyene macrolides such as nigericin, elaiophylin and geldanamycin<sup>36,38,51-56</sup>. However, strains sharing  
183 phylogenetic vicinity may differ in their specialised metabolism due to variation in their content of  
184 BGCs<sup>57,58</sup>. To assess the conservation of BGCs during species radiation among the *S. violaceusniger*  
185 clade, we set up a comparative genomic approach on fully assembled genomes belonging to *S.*  
186 *violaceusniger* clade.

187 We decided to dissect the BGCs content of AgN23 to uncover biosynthesis pathways that are shared  
188 with other *S. violaceusniger* representative, found outside of this clade or unique to the strain. We  
189 predicted BGC-containing regions from genomes of the four *S. violaceusniger* strains previously  
190 selected for CAZy comparisons. The antiSMASH outputs were introduced into BiG-SCAPE to group the  
191 235 detected BGCs into 93 gene clusters families and to visualise their relationships by sequence  
192 similarity networks (Figure 4a).

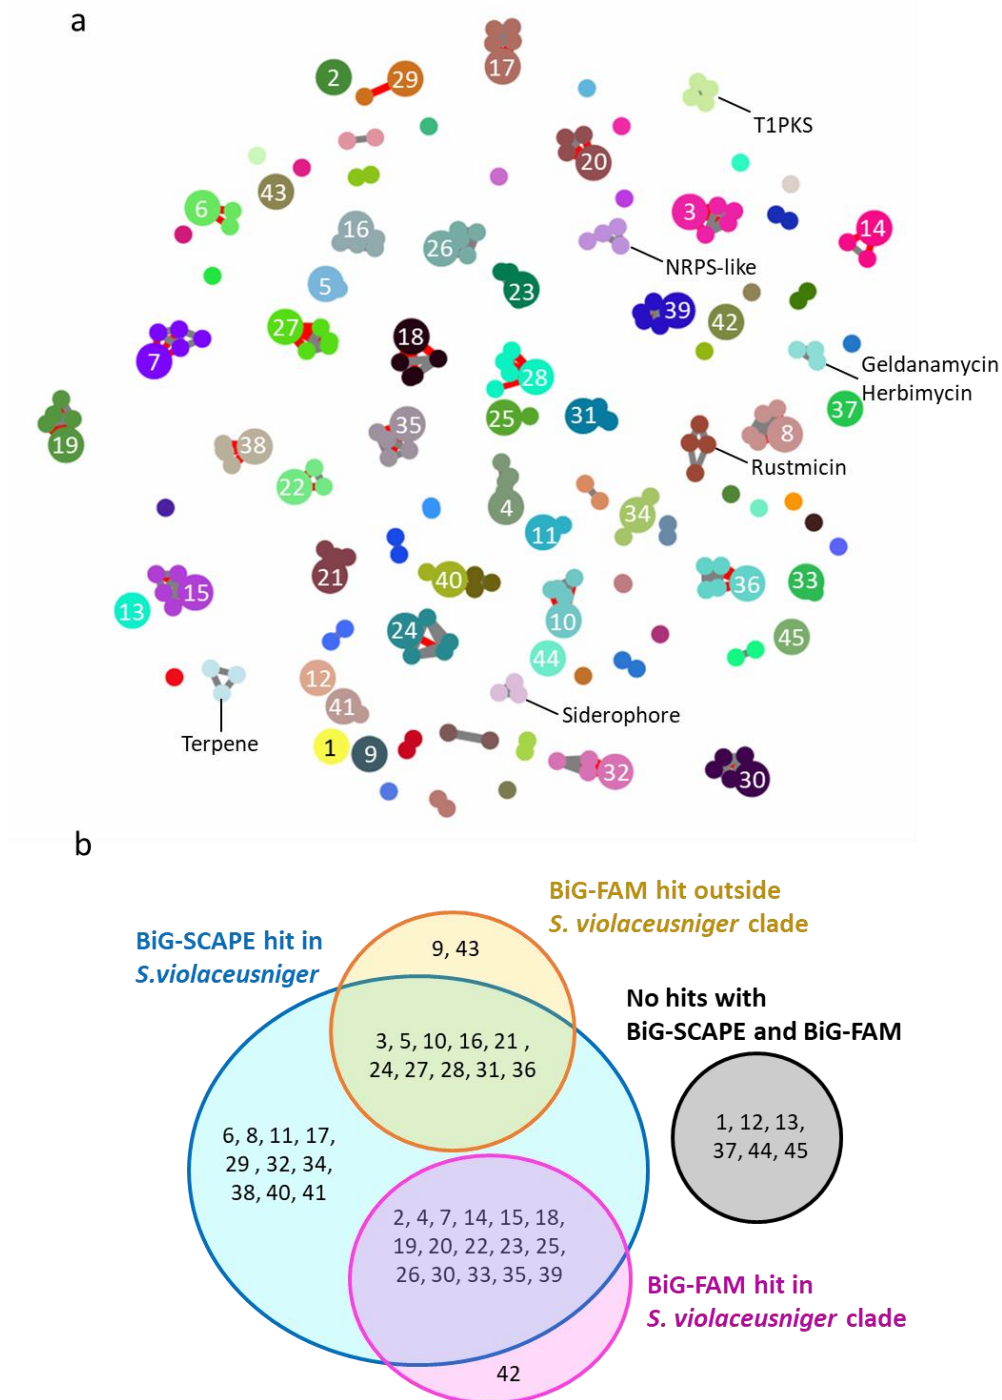

193

194 **Figure 4: Twenty-six BGC-containing regions in *Streptomyces* sp. AgN23 genome are specifically**  
195 **found within *S. violaceusniger* strains.** a) BiG-SCAPE similarity network analysis of AgN23 and four  
196 close isolates reveals that 22 BGC-containing regions are found by the given members of the *S.*  
197 *violaceusniger* clade. Each node represents a BGC-containing region from one of the 5 compared  
198 genomes. They are coloured according one of the 93 gene cluster families and are clustered within  
199 regions displaying similar organisation. AgN23 BGC are displayed as larger nodes harbouring its region  
200 number. b) Venn Diagram showing the combination of BiG-SCAPE and BiG-FAM analyses to distribute  
201 hits of BGC-containing region of *Streptomyces* sp. AgN23 genome in or out *S. violaceusniger* clade.

202 Twenty-two BGCs from the AgN23 genome showed conservation among all other close isolates while  
203 13 others BGCs had at least one homologue in another isolate and 10 did not show homology with  
204 any of the other four strains selected. We then wondered which of these BGCs were specific to the *S.*  
205 *violaceusniger* clade or shared with another *Streptomyces* lineage. To address this question, the  
206 sequences of the 45 AgN23 BGCs were compared to the 1,225,071 BGCs of the BiG-FAM database  
207 using the BiG-SLICE algorithm. Twenty-eight BGCs obtained a BGC-to-GCFs (Gene Cluster Families)  
208 pairing distance lower than 900 in BiG-FAM, meaning that they share similar domain architectures  
209 with previously described BGCs (Figure 4b). The combination of the two analyses allowed us to  
210 conclude on orthologues distribution across *Streptomyces* phylogeny for each BGC-containing region  
211 detected in *Streptomyces* AgN23 genome.

212 Ten BGCs belonged to gene cluster families encountered both inside and outside of the *S.*  
213 *violaceusniger* clade (Figure 4b). This suggests that they are widely conserved among the *Streptomyces*  
214 genus. This group contains BGCs similar to the BGCs of terpene pristinol (region 10), ectoin (region  
215 16), desferrioxamin B (region 24) and hopene (region 31) but also unknown BGCs annotated as  
216 terpene (Region 3), bacteriocins (region 5 and 28), indole (region 21), siderophore (region 27) and  
217 butyrolactone (region 36).

218 We then found that 26 of AgN23 BGCs shared orthologues exclusively with other *S. violaceusniger*  
219 representatives. Among them, we found the regions 20 and 30 predicted to encode enzymes for the  
220 biosynthesis of pigments that might be responsible of for the characteristic grey coloration of spores  
221 among members of the clade. Aside from such regions involved in the strain life cycle, the regions 18,  
222 39 and 40 are predicted to code for the biosynthesis of the antifungals mediomycin A, nigericin and  
223 niphimycins C-E respectively and the regions 26 and 38 may be involved in synthesis of analogues of  
224 the plant bioactive echosides and elaiophylin (Figure 5). Notably, the BGC involved in the biosynthesis  
225 of geldanamycin, a hallmark phytotoxic, antifungal and antibacterial compound of *S. violaceusniger*

226 species was detected in 3 strains but not AgN23 and its closest neighbour *S. antimycoticus* (Figure 4a)

227 59.

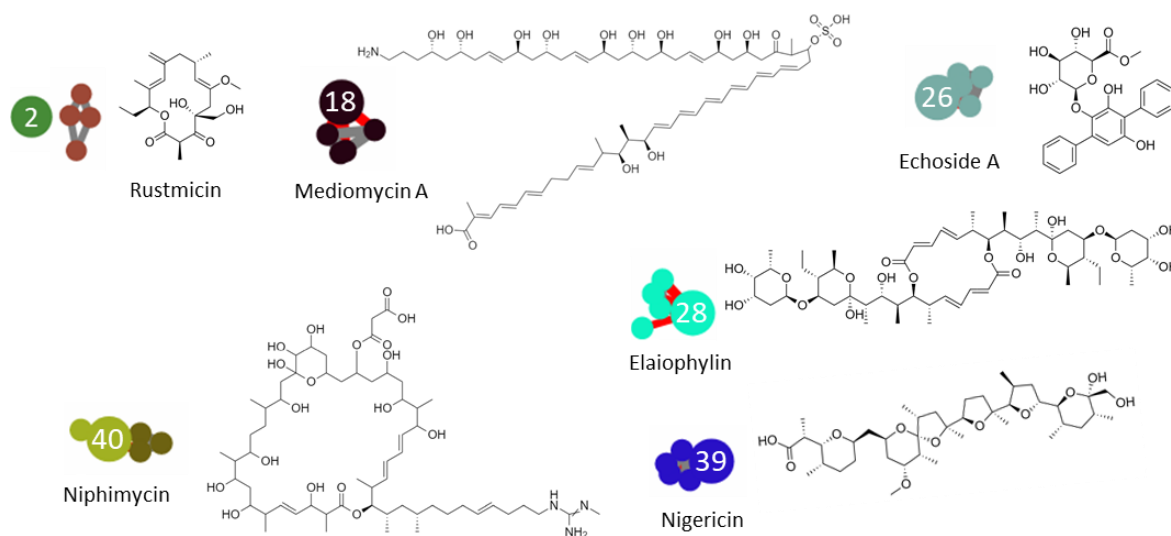

228

229 **Figure 5: Candidate BGCs for antimicrobials and plant bioactive compounds of *Streptomyces* sp.**  
230 **AgN23 are conserved in the *S. violaceusniger* clade.** Connected nodes are part of the sequence  
231 similarity network produced by the BiG-SCAPE comparison of AgN23 genome with four other *S.*  
232 *violaceusniger* isolates. Each node represents a BGC, they are connected when sharing sequence  
233 similarity, colours representing BiG-SCAPE gene clusters families. AgN23 BGCs are displayed as larger  
234 nodes harbouring the number of their corresponding region. The structures on the right correspond  
235 to putative compounds produced by highly similar BGCs according to antiSMASH.

236

237 Intriguingly, the BIG-SCAPE analysis clustered regions containing rustmicin-like BGCs from the four *S.*  
238 *violaceusniger* strains we selected for comparative studies but did not add to this cluster the region 2  
239 of AgN23 also annotated as rustmicin by antiSMASH (Table 2). Since the organisation of the five BGCs  
240 are very similar to the subcluster GalA-E of *S. galbus* responsible for the biosynthesis of the  
241 macrolactone ring of the compound, we propose that rustmicin biosynthesis is among core BGCs  
242 functions of the *S. violaceusniger* clade<sup>60</sup> (Figure 6). Given *S. violaceusniger* isolates are frequently  
243 isolated in interactions with plant roots, these data suggest that these specialised metabolites support  
244 their accommodation into the plant rhizosphere and root microbiota<sup>36,61</sup>.

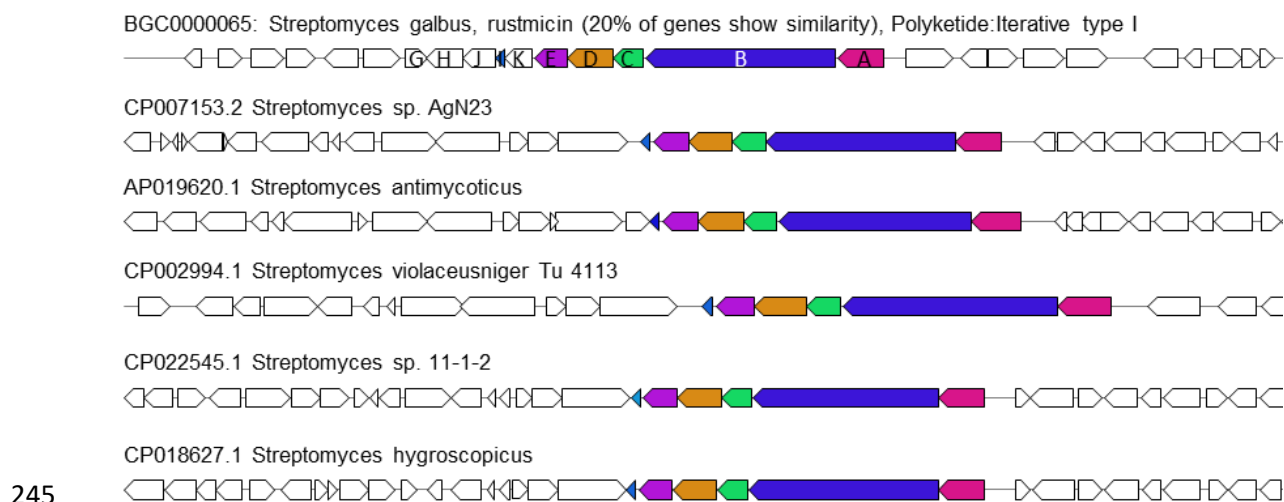

246 **Figure 6: Rustmicin ABCDE biosynthetic gene cluster is conserved across *S. violaceusniger* clade.**  
247 Comparison of the rustmicin BGC sequence from MiBIG (BGC0000065) with genomic regions that are  
248 similar in AgN23 and four others *S. violaceusniger* genomes. Coloured genes are putative homologs  
249 according to antiSMASH with ClusterBLAST  $e$ -value  $< 1E-05$ , an identity  $> 30\%$  and a query cover  $>$   
250  $25\%$ .

251

#### 252 **AgN23 chromosome terminal regions harbour putatively unique biosynthetic gene clusters**

253 Whilst we found a large core set of 26 BGCs is shared by AgN23 and four other *S. violaceusniger*  
254 isolates, six BGC-containing regions predicted in AgN23 genome show no similarity to any BGCs found  
255 within or outside the *violaceusniger* clade according to BiG-FAM and BiG-SCAPE analysis (Figure 4b).  
256 However, some of these regions received a MiBIG hit attributed by antiSMASH. This is notably the  
257 case of the region 12 which show similarity with the BGC responsible of the biosynthesis of  
258 totopotensamide in *S. pactum* a strain being outside of the *S. violaceusniger* clade (Table 2). The  
259 remaining regions showed no or  $< 10\%$  MiBIG hit and may constitute uncharacterised biosynthetic  
260 pathways for novel compounds.

261 *Streptomyces* chromosome organisation consists in a central conserved genome whilst terminal  
262 sequences contain more variable gene content described as accessory genome<sup>62-64</sup>. This accessory  
263 genome undergoes frequent amplification and deletion events as well as interspecies homologous  
264 recombination<sup>65-70</sup>. Regarding terminal sequences, 3 out of 5 regions located in the first 700 kb of the  
265 AgN23 chromosome left arm showed neither hit in other *S. violaceusniger* strains nor significant



266 alignment with known MiBIG reference (Supplementary Information 3, Figure 7). The same  
267 observation was drawn for the region 42 to 45 located in the last 700 kb of the chromosome right  
268 extremity. Interestingly, region 42 have 90% similarity to the one encoding coelichelin in *S. coelicolor*  
269 and is found in only one other *S. violaceusniger* strain, namely NRRL F-8817. The neighbouring region  
270 43, contains a BGC with 100% similarity to the biosynthetic pathway of the antimicrobial bicyclomycin,  
271 which is absent from other *S. violaceusniger* strains but is found outside of the clade (Table 2). Thus,  
272 regions 42 and 43 may have been acquired by AgN23 through horizontal gene transfer from non-*S.*  
273 *violaceusniger* strains. Taken together these data suggest that AgN23 chromosome fulfils the classical  
274 organisation of *Streptomyces* genome with variable genetic sequences located in terminal regions.

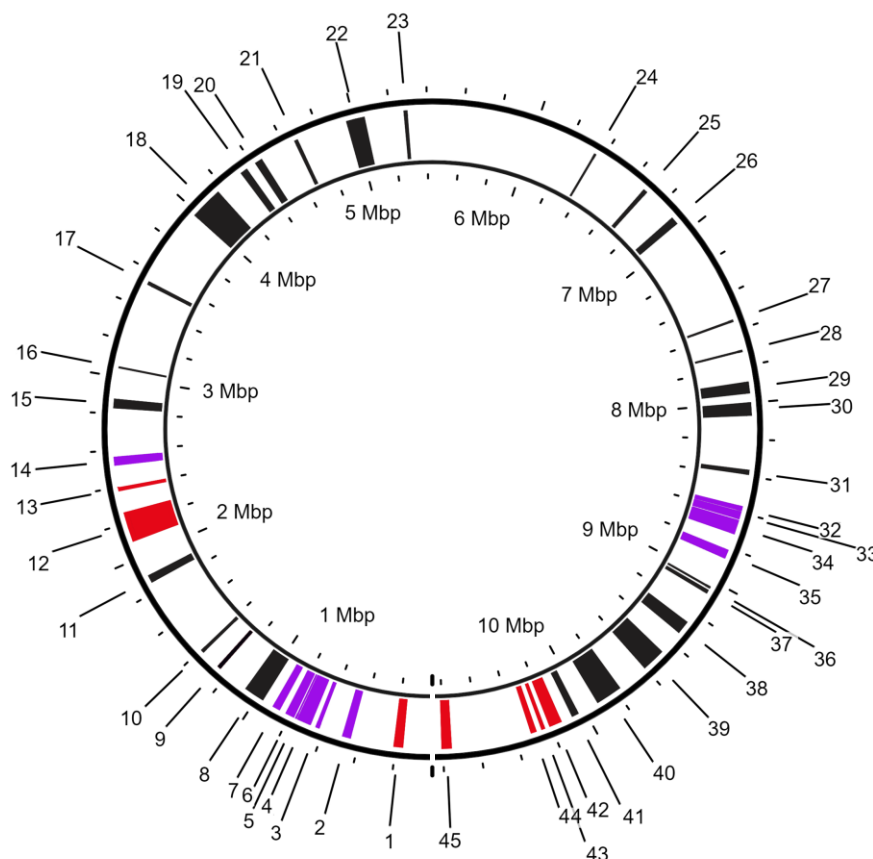

275

276 **Figure 7: Schematic representation of antiSMASH-predicted BGCs-containing region along**  
277 ***Streptomyces* sp. AgN23 linear chromosome.** Regions are numbered from 1 (left arm) to 45 (right  
278 arm) on the chromosome. The regions in red are non-conserved into *S. violaceusniger* clade according  
279 to both BiG-SCAPE and BiG-FAM analysis. The regions coloured in purple had no hit or a hit  $\leq 20\%$  of  
280 similarity with a BGC from the MiBIG database.

281 **CONCLUSION**

282 Plant roots recruit abundant and diverse consortia of microorganisms whilst exploring the soil. The  
283 relevance of this root microbiota in plant nutrition and resistance to stresses is currently unveiled  
284 through metabarcoding studies of plant microbiota. *Streptomyces* genus constitutes one of the most  
285 prominent bacterial genera colonising plant roots <sup>6</sup>. However, such studies do not inform on the  
286 species diversity of *Streptomyces* and the genomic features enabling their colonisation of plant roots.  
287 Therefore, genome sequencing of root associated *Streptomyces* is an important step toward the  
288 description of their molecular interaction with host plant. Here we produced a complete chromosome  
289 sequence of *Streptomyces* sp. AgN23, a strain isolated from grapevine rhizosphere and shown to elicit  
290 plant defence responses <sup>15</sup>. A whole genome-based phylogeny of AgN23 showed that it belongs to the  
291 *S. violaceusniger* clade from whom several other genome-sequenced strains have been isolated in  
292 rhizosphere of diverse plants around the world. We found that AgN23 genome, as well as other  
293 representative strains of the *S. violaceusniger* clade is rich in CAZymes able to degrade plant-derived  
294 carbohydrates and BGCs producing specialised metabolite potentially involved in the interaction with  
295 the plant. In addition, this phylogenetic lineage is considered as having a high potential in terms of  
296 specialised metabolism as its members have a large genome between 10.7 and 12.7 Mb and possess  
297 from 45 to 55 BGCs <sup>71</sup>. The wealth of genomic data available in this clade allowed us to unveil common  
298 trends in the BGCs specifically found in *S. violaceusniger* isolates. The ability of these strains to produce  
299 antifungal compounds (nigericin, niphimycin, mediomycin, rustmicin) as well as elicitors of plant  
300 defence (nigericin) strongly suggests that they play an important role in protection from pathogens.  
301 In addition, echosides and elaiophylin from whom structural analogues have been shown to interfere  
302 with auxin like responses suggest they may interfere with plant development <sup>47,49</sup>. Designing reverse  
303 genetic approach to inactivate candidates BGCs will allow dissecting the involvement of AgN23  
304 specialised metabolism in the interaction with the plant and its microbiota.

305

## 306 **MATERIALS AND METHODS**

### 307 **AgN23 cultivation and HMW DNA extraction**

308 AgN23 strain was cultivated as described previously<sup>15,72</sup>. In brief the strain was grown on solid  
309 modified Bennet medium (D-Glucose 10 g/l; Soybean peptones 2.5 g/l; Yeast Extract 1.5 g/l; Agarose  
310 16 g/l) or International Streptomyces Project media<sup>73,74</sup>. To produce spore inoculum, we incubated  
311 Bennet plates for two weeks at 22°C in the darkness before filling them with 10 ml of sterile water.  
312 The mycelium was scraped with a spreader and the resulting solution was filtered in 50 ml syringe  
313 filled with non-absorbent cotton wool. For DNA extraction the AgN23 mycelium was grown at 28°C  
314 and under 250 rpm in 250 ml Erlenmeyer flasks containing 50 ml of liquid Bennet. Approximately 100  
315 mg of AgN23 pellets were collected by centrifugation at 11 000 g and flash frozen in liquid nitrogen.  
316 Genomic DNA was isolated using the Macherey-Nagel Nucleobond RNA/DNA kit according to the  
317 manufacturer's instructions.

### 318 **Library preparation for genome sequencing**

319 Library preparation and sequencing were performed at the GeT-PlaGe core facility (Castanet-Tolosan),  
320 according to the manufacturer's instructions "Shared protocol-20kb Template Preparation Using  
321 BluePippin Size Selection system (15kb size cut-off)". At each step, DNA was quantified using the Qubit  
322 dsDNA HS Assay Kit (Life Technologies). DNA purity was tested using the NanoDrop (Thermo Fisher)  
323 and size distribution and degradation assessed using High Sensitivity Large Fragment 50kb Analysis Kit  
324 used with a Fragment analyser (AATI). Purification steps were performed using 0.45X AMPure PB  
325 beads (PacBio). A total of 10 µg of DNA was purified then sheared at 40kb using the Megaruptor  
326 system (Diagenode). Using SMRTBell template Prep Kit 1.0 (PacBio), a DNA and END damage repair  
327 step was performed on 5 µg of sample. Then, blunt hairpin adapters were ligated to the library. The  
328 library was treated with an exonuclease cocktail to digest unligated DNA fragments. A size selection  
329 step using a 10kb cut-off was performed on the BluePippin Size Selection system (Sage Science) with  
330 0.75% agarose cassettes, Marker S1 high Pass 15-20 kb. Conditioned Sequencing Primer V2 was

331 annealed to the size selected SMRTbell. The annealed library was then bound to the P6-C4 polymerase  
332 using a ratio of polymerase to SMRTbell at 10:1. Then after a magnetic bead-loading step (OCPW),  
333 SMRTcell libraries were sequenced on 2 SMRTcells on RSII instrument at 0.18 to 0.23 nM with a 360  
334 min movie. The initially generated raw sequencing reads were evaluated in terms of the average  
335 quality score at each position, GC content distribution, quality distribution, base composition, and  
336 other metrics. Sequencing reads with low quality were also filtered out before the genome assembly  
337 and annotation of gene structure. Finally, microbial DNA potential contamination was excluded after  
338 comparison by blast of the draft assembly of the first SMRT cell against a 16S ribosomal RNA  
339 sequences data bank (Bacteria and Archaea).

#### 340 **Genome assembly, annotation, and comparative genomics**

341 The subreads were assembled with the Pacific Biosciences software SMRTanalysis version 2.3.0 using  
342 default settings with a minimum subreads length of 3 kb to exclude smaller sequenced reads and a  
343 read score of better than 0.8 to enrich in reads with a low error rate. The single Unitig obtained by  
344 long-read sequencing was corrected with Mi-Seq (Illumina®) data using Pilon (version 1.21), resulting  
345 in 165 substitutions and two deletions of 44 and 5 bases. This final genome assembly was retained for  
346 subsequent analysis. The gene annotation was performed on the MicroScope Microbial Genome  
347 Annotation & Analysis Platform<sup>16</sup>. CAZy genes annotation was obtained running the HMMER tool (E-  
348 Value < 1e-15, coverage > 0.35) on the dbCAN2 meta server<sup>39</sup>. The antiSMASH 5.0 server was used  
349 to detect BGC-containing regions in the AgN23 chromosome and annotate detected sequences based  
350 on the MiBIG 2.0 repository<sup>40,41</sup>. The comparative genomics was performed using combination of two  
351 tools. The first was the Antibiotic Resistant Target Seeker (ARTS) webservice to introduce the perform  
352 antiSMASH analyses of the 5 compared genomes with the BIG-SCAPE software<sup>75,76</sup>. The second was  
353 the BiG-FAM server that we use to find similar BGCs that the one predicted by AgN23 antiSMASH  
354 results among the 1,225,071 BGCs stored in the BiG-FAM database using the BiG-SLiCE software (1.0.0)  
355 with an arbitrary clustering threshold (T=900.0)<sup>77,78</sup>

## 356 **Phylogenomic analysis**

357 Genome of *Streptomyces* sp. AgN23 and related strains and outgroups were selected to perform  
358 genome-scale phylogeny of AgN23 with autoMLST<sup>20</sup>. *Streptomyces* sp. M56, *Streptomyces* sp. 11-1-2,  
359 *S. rapamycinicus* NRRL 5491, *S. malaysiensis* DSM4137, *S. antimycoticus* NBRC 100767 were chosen  
360 based on their belonging to the *S. violaceusniger* clade according to the bibliography as well as the  
361 genomes of the model strain *S. coelicolor* A(3)2 and of the two biocontrol strains, *S. lydicus* WYEC108  
362 and *S. griseoveridis* K61, were added. *Frankia alni* ACN14a were used as outgroup (Supplementary  
363 Table 1). Phylogenetic tree has a bootstrap value of 100.

## 364 **Library preparation for transcriptome sequencing and expression analysis**

365 AgN23 was cultivated on Bennett medium at 28°C for 48h. Total RNA was isolated using the RNeasy  
366 Plant Mini Kit Qiagen according to manufacturer's instructions. Three replicates were prepared for the  
367 libraries construction. RNA-seq libraries have been prepared according to Illumina's protocols using  
368 the Illumina TruSeq Stranded mRNA sample prep kit to analyse mRNA. Briefly, ribodepletion was  
369 carried out to clean up mRNAs using poly-T beads. Then, RNAs were fragmented to generate double  
370 stranded cDNA and adaptors were ligated to be sequenced. Eleven cycles of PCR were applied to  
371 amplify libraries. Library quality was assessed using a Fragment Analyzer and libraries were quantified  
372 by QPCR using the Kapa Library Quantification Kit. RNA-Seq experiments have been performed on an  
373 Illumina HiSeq4000 using a paired-end read length of 2x150 bp with the Illumina HiSeq4000  
374 sequencing kits. The analysis was performed using the bioinformatics pipeline implemented in the  
375 MicroScope Platform<sup>16</sup>. In a first step, raw reads of each sample (R1 fastq files from the paired-end  
376 run) were mapped onto *Streptomyces* sp. AgN23 reference genome with BWA-MEM (v.0.7.4)<sup>79</sup>. An  
377 alignment score equal to at least half of the read was required for a hit to be retained. SAMtools  
378 (v.0.1.8) was then used to extract reliable alignments with a Mapping Quality (MAPQ) $\geq$ 1 from SAM  
379 formatted files<sup>80</sup>. The number of reads matching each genomic object of the reference sequence was  
380 subsequently counted with the toolset BEDTools (v.2.10.1)<sup>81</sup>. The mean read counts of each gene was

381 calculated from three independent samples. The BGCs expression levels have been determined by  
382 calculating the mean expression of biosynthetic genes for each BGC as defined by antiSMASH. A mean  
383 expression for each BGC across the three biological repetitions was then determined.

#### 384 **Scanning electronic microscopy**

385 The observation of AgN23 mycelium and spore development by Scanning Electronic microscopy was  
386 performed on a FEG FEI Quanta 250. Agar plugs of AgN23 two weeks old culture were placed on  
387 micrometric platen, frozen in liquid nitrogen and finally metallized with platinum. The samples were  
388 observed microscopically at an accelerating voltage of 5.00 kV.

#### 389 **SUPPLEMENTARY INFORMATION**

390 **Supplementary Information 1:** Annotation of AgN23 full chromosome. For each gene the frame of  
391 translation, sequence length and position on the chromosome are indicated. All genes were annotated  
392 according to the Microscope platform, see materials and methods. In addition, the mean raw reads  
393 count found in RNA-seq data is indicated for each gene.

394 **Supplementary Information 2:** Genomes having a Mash-based estimated ANI (Average Nucleotide  
395 Identity) superior or equal to 80% according to autoMLST.

396 **Supplementary Information 3:** Prediction of the CAZyme encoding genes using HMMER dbCAN2.  
397 Mean raw reads count from the RNA-seq is indicated for each gene as well as the predicted targets of  
398 the putative enzymes.

399 **Supplementary Information 4:** Gene identified by antiSMASH in the region containing a biosynthetic  
400 gene cluster. Mean raw reads count from the RNA -eq is indicated for each gene. Annotated central  
401 biosynthetic genes are indicated as Y. Those are the ones used for the calculation of mean BGC  
402 expression in Table 2.

403

#### 404 **DATA AVAILABILITY**

405 The raw reads sequences of AgN23 genome are available at NCBI on the Sequence Read Archive portal  
406 for PacBio and MiSeq data (SRR13990229 and SRR14028548 respectively). The Genome assembly is  
407 available on the NCBI nucleotide portal under the accession NZ\_CP007153.1. This genome sequence  
408 was uploaded on the MicroScope platform for genome annotation and analysis  
409 (<https://mage.genoscope.cns.fr/microscope/home/index.php>)<sup>16</sup>. The RNA-seq raw reads are  
410 archived in the NCBI Bioproject PRJNA745930. The genome sequence used in BiG-SCAPE analysis can  
411 be retrieved from the NCBI GenBank portal for *S. antimycoticus* NBRC 100767, *Streptomyces* sp. 11-1-  
412 2, *S. hygroscopicus* XM201, *S. violaceusniger* Tü 4113, *Streptomyces coelicolor* A3(2) and *Streptomyces*  
413 sp. SirexAA-E with the accession number AP019620.1, CP022545.1, CP018627.1, CP002994.1,  
414 AL645882 and CP002993 respectively.

#### 415 **ACKNOWLEDGEMENT**

416 This work was funded by the Fond Unique Interministériels (NEOPROTEC project), the Fonds Européen  
417 de Développement Économique et Régional (FEDER), the Agence Nationale de la Recherche (LabCom  
418 BioPlantProtec ANR-14-LAB7-0001 and STREPTOCONTROL ANR-17-CE20-0030) and the Région  
419 Occitanie (projet GRAINE-BioPlantProducts). The Laboratoire de Recherche en Sciences Végétales  
420 (LRSV) belongs to the TULIP Laboratoire d'Excellence (ANR-10-LABX-41). Work performed in the GeT  
421 core facility, Toulouse, France (<https://get.genotoul.fr>) was supported by the France Génomique  
422 National infrastructure, funded as part of the "Investissement d'Avenir" program managed by the  
423 Agence Nationale de la Recherche (contract ANR-10-INBS-09) and by the GET-PACBIO program (FEDER  
424 Programme opérationnel FEDER-FSE MIDI-PYRENEES ET GARONNE 2014-2020). D. Gayrard was  
425 funded by Agence Nationale de la Recherche Technique, with the Convention Industrielle de  
426 Formation par la Recherche and Association Nationale de la Recherche et de la Technologie (grant  
427 number 2016/1297). We warmly thanks Olivier Bouchez for helpful discussions on Next Generation  
428 Sequencing strategy throughout the project. We are grateful to Sylvie Lautru and Jean-Luc Pernodet



429 (I2BC, Paris) for helpful discussions. We thank Clément Nicolle, Thierry Grollier and Valérie Arnal for  
430 helpful comments on earlier version of the manuscript.

#### 431 **AUTHOR CONTRIBUTIONS**

432 Gayrard D. performed the research and wrote the manuscript. Veyssière M. and Adam K., Martinez  
433 Y., Vandecasteele C. and Vidal M. performed the research. Dumas B. and Rey T. designed the research  
434 and wrote the manuscript.

#### 435 **COMPETING INTERESTS**

436 The following information may be foreseen as competing interest. B. Dumas is one of inventors of the  
437 patent WO2015044585A1 relating the use of AgN23 in Agriculture. T. Rey and D. Gayrard are full-time  
438 researchers in the AgChem company De Sangosse (Pont-Du-Casse, France), which registers and  
439 markets crop-protection products.

#### 440 **LITERATURE CITED**

- 441 1 Bush, M. J., Tschowri, N., Schlimpert, S., Flärdh, K. & Buttner, M. J. c-di-GMP signalling and the  
442 regulation of developmental transitions in streptomycetes. *Nat Rev Microbiol* **13**, 749-760,  
443 doi:10.1038/nrmicro3546 (2015).
- 444 2 Book, A. J. *et al.* Evolution of High Cellulolytic Activity in Symbiotic Streptomyces through  
445 Selection of Expanded Gene Content and Coordinated Gene Expression. *PLOS Biology* **14**,  
446 e1002475, doi:10.1371/journal.pbio.1002475 (2016).
- 447 3 Moumbock, A. F. A. *et al.* StreptomeDB 3.0: an updated compendium of streptomycetes  
448 natural products. *Nucleic Acids Res* **49**, D600-D604, doi:10.1093/nar/gkaa868 (2021).
- 449 4 Barka, E. A. *et al.* Taxonomy, Physiology, and Natural Products of Actinobacteria. *Microbiol*  
450 *Mol Biol Rev* **80**, 1-43, doi:10.1128/MMBR.00019-15 (2016).
- 451 5 Lee, N. *et al.* Thirty complete Streptomyces genome sequences for mining novel secondary  
452 metabolite biosynthetic gene clusters. *Sci Data* **7**, 55, doi:10.1038/s41597-020-0395-9 (2020).
- 453 6 Lundberg, D. S. *et al.* Defining the core Arabidopsis thaliana root microbiome. *Nature* **488**, 86-  
454 90, doi:10.1038/nature11237 (2012).
- 455 7 Fitzpatrick, C. R. *et al.* Assembly and ecological function of the root microbiome across  
456 angiosperm plant species. *Proc Natl Acad Sci U S A* **115**, E1157-E1165,  
457 doi:10.1073/pnas.1717617115 (2018).
- 458 8 Vurukonda, S. S. K. P., Giovanardi, D. & Stefani, E. Plant Growth Promoting and Biocontrol  
459 Activity of Streptomyces spp. as Endophytes. *Int J Mol Sci* **19**, doi:10.3390/ijms19040952  
460 (2018).
- 461 9 Hamedi, J. & Mohammadipanah, F. Biotechnological application and taxonomical distribution  
462 of plant growth promoting actinobacteria. *Journal of industrial microbiology & biotechnology*  
463 **42**, 157-171 (2015).

- 464 10 Rey, T. & Dumas, B. Plenty Is No Plague: Streptomyces Symbiosis with Crops. *Trends Plant Sci*  
465 **22**, 30-37, doi:10.1016/j.tplants.2016.10.008 (2017).
- 466 11 Viaene, T., Langendries, S., Beirinckx, S., Maes, M. & Goormachtig, S. Streptomyces as a plant's  
467 best friend? *FEMS Microbiol Ecol* **92**, doi:10.1093/femsec/fiw119 (2016).
- 468 12 Medema, M. H. The year 2020 in natural product bioinformatics: an overview of the latest  
469 tools and databases. *Nat Prod Rep* **38**, 301-306, doi:10.1039/d0np00090f (2021).
- 470 13 Tracanna, V., de Jong, A., Medema, M. H. & Kuipers, O. P. Mining prokaryotes for antimicrobial  
471 compounds: from diversity to function. *FEMS Microbiol Rev* **41**, 417-429,  
472 doi:10.1093/femsre/fux014 (2017).
- 473 14 Kautsar, S. A., Blin, K., Shaw, S., Weber, T. & Medema, M. H. BiG-FAM: the biosynthetic gene  
474 cluster families database. *Nucleic Acids Res* **49**, D490-D497, doi:10.1093/nar/gkaa812 (2021).
- 475 15 Vergnes, S. *et al.* Phyllosphere colonisation by a soil Streptomyces sp. promotes plant defense  
476 responses against fungal infection. *Mol Plant Microbe Interact*, doi:10.1094/MPMI-05-19-  
477 0142-R (2019).
- 478 16 Vallenet, D. *et al.* MicroScope: an integrated platform for the annotation and exploration of  
479 microbial gene functions through genomic, pangenomic and metabolic comparative analysis.  
480 *Nucleic Acids Res* **48**, D579-D589, doi:10.1093/nar/gkz926 (2020).
- 481 17 Parks, D. H., Imelfort, M., Skennerton, C. T., Hugenholtz, P. & Tyson, G. W. CheckM: assessing  
482 the quality of microbial genomes recovered from isolates, single cells, and metagenomes.  
483 *Genome Research* **25**, 1043-1055, doi:10.1101/gr.186072.114 (2015).
- 484 18 Simão, F. A., Waterhouse, R. M., Ioannidis, P., Kriventseva, E. V. & Zdobnov, E. M. BUSCO:  
485 assessing genome assembly and annotation completeness with single-copy orthologs.  
486 *Bioinformatics* **31**, 3210-3212, doi:10.1093/bioinformatics/btv351 (2015).
- 487 19 Labeda, D. P. *et al.* Phylogenetic study of the species within the family Streptomycetaceae.  
488 *Antonie Van Leeuwenhoek* **101**, 73-104, doi:10.1007/s10482-011-9656-0 (2012).
- 489 20 Alanjary, M., Steinke, K. & Ziemert, N. AutoMLST: an automated web server for generating  
490 multi-locus species trees highlighting natural product potential. *Nucleic Acids Res* **47**, W276-  
491 W282, doi:10.1093/nar/gkz282 (2019).
- 492 21 Kumar, Y. & Goodfellow, M. Five new members of the Streptomyces violaceusniger 16S rRNA  
493 gene clade: Streptomyces castelarensis sp. nov., comb. nov., Streptomyces himastatinicus sp.  
494 nov., Streptomyces mordarskii sp. nov., Streptomyces rapamycinicus sp. nov. and  
495 Streptomyces ruanii s. *International Journal of Systematic and Evolutionary Microbiology* **58**,  
496 1369-1378, doi:10.1099/ijs.0.65408-0 (2008).
- 497 22 Komaki, H. & Tamura, T. Reclassification of Streptomyces castelarensis and Streptomyces  
498 sporoclivatus as later heterotypic synonyms of Streptomyces antimycoticus. *International*  
499 *Journal of Systematic and Evolutionary Microbiology*, doi:10.1099/ijsem.0.003882 (2020).
- 500 23 Goodfellow, M., Kumar, Y., Labeda, D. P. & Sembiring, L. The Streptomyces violaceusniger  
501 clade: a home for streptomycetes with rugose ornamented spores. *Antonie van Leeuwenhoek*  
502 **92**, 173-199, doi:10.1007/s10482-007-9146-6 (2007).
- 503 24 Yin, M., Jiang, M., Ren, Z., Dong, Y. & Lu, T. The complete genome sequence of Streptomyces  
504 autolyticus CGMCC 0516, the producer of geldanamycin, autolytymycin, reblastatin and  
505 elaiophylin. *J Biotechnol* **252**, 27-31, doi:10.1016/j.jbiotec.2017.04.037 (2017).
- 506 25 Ser, H.-L. *et al.* Streptomyces antioxidans sp. nov., a Novel Mangrove Soil Actinobacterium  
507 with Antioxidative and Neuroprotective Potentials. *Frontiers in Microbiology* **7**,  
508 doi:10.3389/fmicb.2016.00899 (2016).
- 509 26 Hamedi, J. *et al.* Streptomyces iranensis sp. nov., isolated from soil. *Int J Syst Evol Microbiol*  
510 **60**, 1504-1509, doi:10.1099/ijs.0.015339-0 (2010).
- 511 27 Chagas, F. O. *et al.* Genome Sequence of Streptomyces sp. Strain RTd22, an Endophyte of the  
512 Mexican Sunflower. *Genome Announc* **4**, doi:10.1128/genomeA.00693-16 (2016).

- 513 28 Yang, H., Zhang, Z., Yan, R., Wang, Y. & Zhu, D. Draft Genome Sequence of *Streptomyces* sp.  
514 Strain PRh5, a Novel Endophytic Actinomycete Isolated from Dongxiang Wild Rice Root.  
515 *Genome Announc* **2**, doi:10.1128/genomeA.00012-14 (2014).
- 516 29 Bown, L. & Bignell, D. R. D. Draft Genome Sequence of the Plant Pathogen. *Genome Announc*  
517 **5**, doi:10.1128/genomeA.00968-17 (2017).
- 518 30 Zeng, J. *et al.* The Role of Iron Competition in the Antagonistic Action of the Rice Endophyte  
519 *Streptomyces sporocinereus* OsiSh-2 Against the Pathogen *Magnaporthe oryzae*. *Microb Ecol*  
520 **76**, 1021-1029, doi:10.1007/s00248-018-1189-x (2018).
- 521 31 Xu, T. *et al.* Isolation and evaluation of endophytic *Streptomyces endus* OsiSh-2 with potential  
522 application for biocontrol of rice blast disease. *J Sci Food Agric* **97**, 1149-1157,  
523 doi:10.1002/jsfa.7841 (2017).
- 524 32 Cao, L. *et al.* *Streptomyces hygroscopicus* OsiSh-2-induced mitigation of Fe deficiency in rice  
525 plants. *Plant Physiol Biochem* **158**, 275-283, doi:10.1016/j.plaphy.2020.11.013 (2021).
- 526 33 Gao, Y. *et al.* Endophytic. *mBio*, e0156621, doi:10.1128/mBio.01566-21 (2021).
- 527 34 Xu, T. *et al.* The antifungal action mode of the rice endophyte *Streptomyces hygroscopicus*  
528 OsiSh-2 as a potential biocontrol agent against the rice blast pathogen. *Pestic Biochem Physiol*  
529 **160**, 58-69, doi:10.1016/j.pestbp.2019.06.015 (2019).
- 530 35 Komaki, H. *et al.* Draft genome sequence of *Streptomyces* sp. TP-A0867, an alchivemycin  
531 producer. *Stand Genomic Sci* **11**, 85, doi:10.1186/s40793-016-0207-1 (2016).
- 532 36 Goodfellow, M., Kumar, Y., Labeda, D. P. & Sembiring, L. The *Streptomyces violaceusniger*  
533 clade: a home for Streptomycetes with rugose ornamented spores. *Antonie Van Leeuwenhoek*  
534 **92**, 173-199, doi:10.1007/s10482-007-9146-6 (2007).
- 535 37 Kumar, Y., Aiemsun-Ang, P., Ward, A. C. & Goodfellow, M. Diversity and geographical  
536 distribution of members of the *Streptomyces violaceusniger* 16S rRNA gene clade detected by  
537 clade-specific PCR primers. *FEMS Microbiol Ecol* **62**, 54-63, doi:10.1111/j.1574-  
538 6941.2007.00374.x (2007).
- 539 38 Kumar, Y. & Goodfellow, M. Five new members of the *Streptomyces violaceusniger* 16S rRNA  
540 gene clade: *Streptomyces castelarensis* sp. nov., comb. nov., *Streptomyces himastatinicus* sp.  
541 nov., *Streptomyces mordarskii* sp. nov., *Streptomyces rapamycinicus* sp. nov. and  
542 *Streptomyces ruanii* sp. nov. *Int J Syst Evol Microbiol* **58**, 1369-1378, doi:10.1099/ijs.0.65408-  
543 0 (2008).
- 544 39 Yin, Y. *et al.* dbCAN: a web resource for automated carbohydrate-active enzyme annotation.  
545 *Nucleic Acids Res* **40**, W445-W451, doi:10.1093/nar/gks479 (2012).
- 546 40 Blin, K. *et al.* antiSMASH 5.0: updates to the secondary metabolite genome mining pipeline.  
547 *Nucleic Acids Res* **47**, W81-W87, doi:10.1093/nar/gkz310 (2019).
- 548 41 Epstein, S. C., Charkoudian, L. K. & Medema, M. H. A standardized workflow for submitting  
549 data to the Minimum Information about a Biosynthetic Gene cluster (MIBiG) repository:  
550 prospects for research-based educational experiences. *Stand Genomic Sci* **13**, 16,  
551 doi:10.1186/s40793-018-0318-y (2018).
- 552 42 Hu, Y. *et al.* Identification and Proposed Relative and Absolute Configurations of Niphimycins  
553 C-E from the Marine-Derived *Streptomyces* sp. IMB7-145 by Genomic Analysis. *J Nat Prod* **81**,  
554 178-187, doi:10.1021/acs.jnatprod.7b00859 (2018).
- 555 43 Harvey, B. M. *et al.* Insights into polyether biosynthesis from analysis of the nigericin  
556 biosynthetic gene cluster in *Streptomyces* sp. DSM4137. *Chem Biol* **14**, 703-714,  
557 doi:10.1016/j.chembiol.2007.05.011 (2007).
- 558 44 Cai, P. *et al.* Polyene Antibiotics from *Streptomyces mediocidicus*. *Journal of Natural Products*  
559 **70**, 215-219, doi:10.1021/np060542f (2007).
- 560 45 Kim, H. J. *et al.* A single module type I polyketide synthase directs de novo macrolactone  
561 biogenesis during galbonolide biosynthesis in *Streptomyces galbus*. *J Biol Chem* **289**, 34557-  
562 34568, doi:10.1074/jbc.M114.602334 (2014).

- 563 46 Hayashi, K. *et al.* Active core structure of terfestatin A, a new specific inhibitor of auxin  
564 signaling. *Bioorg Med Chem* **16**, 5331-5344, doi:10.1016/j.bmc.2008.02.085 (2008).
- 565 47 Wang, X. *et al.* Terfestatins B and C, New p-Terphenyl Glycosides Produced by Streptomyces  
566 sp. RM-5-8. *Org Lett* **17**, 2796-2799, doi:10.1021/acs.orglett.5b01203 (2015).
- 567 48 Yamazoe, A., Hayashi, K., Kepinski, S., Leyser, O. & Nozaki, H. Characterization of terfestatin  
568 A, a new specific inhibitor for auxin signaling. *Plant Physiol* **139**, 779-789,  
569 doi:10.1104/pp.105.068924 (2005).
- 570 49 Igarashi, Y., Iida, T., Yoshida, R. & Furumai, T. Pteridic acids A and B, novel plant growth  
571 promoters with auxin-like activity from Streptomyces hygrosopicus TP-A0451. *J Antibiot*  
572 (Tokyo) **55**, 764-767, doi:10.7164/antibiotics.55.764 (2002).
- 573 50 Maintz, J. *et al.* Chemical Activation of EDS1/PAD4 Signaling Leading to Pathogen Resistance  
574 in Arabidopsis. *Plant and Cell Physiology* **59**, 1592-1607, doi:10.1093/pcp/pcy106 (2018).
- 575 51 Nagpure, A., Choudhary, B. & Gupta, R. K. Mycolytic enzymes produced by Streptomyces  
576 violaceusniger and their role in antagonism towards wood-rotting fungi. *J Basic Microbiol* **54**,  
577 397-407, doi:10.1002/jobm.201200474 (2014).
- 578 52 Riclea, R., Citron, C. A., Rinkel, J. & Dickschat, J. S. Identification of isoafrikanol and its terpene  
579 cyclase in Streptomyces violaceusniger using CLSA-NMR. *Chem Commun (Camb)* **50**, 4228-  
580 4230, doi:10.1039/c4cc00177j (2014).
- 581 53 Chen, X. *et al.* Genome Sequence of Streptomyces violaceusniger Strain SPC6, a Halotolerant  
582 Streptomycece That Exhibits Rapid Growth and Development. *Genome Announc* **1**,  
583 doi:10.1128/genomeA.00494-13 (2013).
- 584 54 Kang, M. J., Strap, J. L. & Crawford, D. L. Isolation and characterization of potent antifungal  
585 strains of the Streptomyces violaceusniger clade active against Candida albicans. *J Ind*  
586 *Microbiol Biotechnol* **37**, 35-41, doi:10.1007/s10295-009-0641-9 (2010).
- 587 55 Hayakawa, M., Yoshida, Y. & Iimura, Y. Selective isolation of bioactive soil actinomycetes  
588 belonging to the Streptomyces violaceusniger phenotypic cluster. *J Appl Microbiol* **96**, 973-  
589 981, doi:10.1111/j.1365-2672.2004.02230.x (2004).
- 590 56 Hayashi, K. *et al.* WS9326A, a novel tachykinin antagonist isolated from Streptomyces  
591 violaceusniger no. 9326. I. Taxonomy, fermentation, isolation, physico-chemical properties  
592 and biological activities. *J Antibiot (Tokyo)* **45**, 1055-1063, doi:10.7164/antibiotics.45.1055  
593 (1992).
- 594 57 Martinet, L. *et al.* On the Risks of Phylogeny-Based Strain Prioritization for Drug Discovery:.  
595 *Biomolecules* **10**, doi:10.3390/biom10071027 (2020).
- 596 58 Choudoir, M. J., Pepe-Ranney, C. & Buckley, D. H. Diversification of Secondary Metabolite  
597 Biosynthetic Gene Clusters Coincides with Lineage Divergence in Streptomyces. *Antibiotics*  
598 (Basel) **7**, doi:10.3390/antibiotics7010012 (2018).
- 599 59 Heisey, R. M. & Putnam, A. R. Herbicidal effects of geldanamycin and nigericin, antibiotics  
600 from Streptomyces hygrosopicus. *J Nat Prod* **49**, 859-865 (1986).
- 601 60 Kim, H.-J. J. *et al.* A single module type I polyketide synthase directs de Novo macrolactone  
602 biogenesis during galbonolide biosynthesis in Streptomyces galbus. *Journal of Biological*  
603 *Chemistry* **289**, 34557-34568, doi:10.1074/jbc.M114.602334 (2014).
- 604 61 Sembiring, L., Ward, A. C. & Goodfellow, M. Selective isolation and characterisation of  
605 members of the Streptomyces violaceusniger clade associated with the roots of  
606 Paraserianthes falcataria. *Antonie Van Leeuwenhoek* **78**, 353-366,  
607 doi:10.1023/a:1010226515202 (2000).
- 608 62 Kim, J. N. *et al.* Comparative Genomics Reveals the Core and Accessory Genomes of  
609 Streptomyces Species. *J Microbiol Biotechnol* **25**, 1599-1605, doi:10.4014/jmb.1504.04008  
610 (2015).
- 611 63 Lioy, V. S. *et al.* Dynamics of the compartmentalized Streptomyces chromosome during  
612 metabolic differentiation. *Nat Commun* **12**, 5221, doi:10.1038/s41467-021-25462-1 (2021).

- 613 64 Szafran, M. J. *et al.* Spatial rearrangement of the *Streptomyces venezuelae* linear chromosome  
614 during sporogenic development. *Nat Commun* **12**, 5222, doi:10.1038/s41467-021-25461-2  
615 (2021).
- 616 65 Choudoir, M. J. & Buckley, D. H. Phylogenetic conservatism of thermal traits explains dispersal  
617 limitation and genomic differentiation of *Streptomyces* sister-taxa. *ISME J* **12**, 2176-2186,  
618 doi:10.1038/s41396-018-0180-3 (2018).
- 619 66 Andam, C. P., Choudoir, M. J., Vinh Nguyen, A., Sol Park, H. & Buckley, D. H. Contributions of  
620 ancestral inter-species recombination to the genetic diversity of extant *Streptomyces*  
621 lineages. *ISME J* **10**, 1731-1741, doi:10.1038/ismej.2015.230 (2016).
- 622 67 Tidjani, A. R. *et al.* Massive Gene Flux Drives Genome Diversity between Sympatric. *MBio* **10**,  
623 doi:10.1128/mBio.01533-19 (2019).
- 624 68 McDonald, B. R. & Currie, C. R. Lateral Gene Transfer Dynamics in the Ancient Bacterial Genus.  
625 *MBio* **8**, doi:10.1128/mBio.00644-17 (2017).
- 626 69 Doroghazi, J. R. & Buckley, D. H. Widespread homologous recombination within and between  
627 *Streptomyces* species. *ISME J* **4**, 1136-1143, doi:10.1038/ismej.2010.45 (2010).
- 628 70 Kun Cheng, X. R., Ying Huang,. Vol. 102 (Molecular Phylogenetics and Evolution, 2016).
- 629 71 Chung, Y.-H. *et al.* Comparative Genomics Reveals a Remarkable Biosynthetic Potential of the  
630 *Streptomyces* Phylogenetic Lineage Associated with Rugose-Ornamented Spores. *Msystems*  
631 **6**, e00489-00421 (2021).
- 632 72 Errakhi, R., Bouteau, F., Lebrihi, A. & Barakate, M. Evidences of biological control capacities of  
633 *Streptomyces* spp. against *Sclerotium rolfsii* responsible for damping-off disease in sugar beet  
634 (*Beta vulgaris* L.). *World Journal of Microbiology and Biotechnology* **23**, 1503-1509,  
635 doi:10.1007/s11274-007-9394-7 (2007).
- 636 73 Shirling, E. B. & Gottlieb, D. in *International Journal of Systematic Bacteriology* Vol. 16 313-  
637 340 (1966).
- 638 74 Kieser, T., Bibb, M. J., Buttner, M. J., Chater, K. F. & Hopwood, D. A. *Practical streptomyces*  
639 *genetics*. Vol. 291 (John Innes Foundation Norwich, 2000).
- 640 75 Mungan, M. D. *et al.* ARTS 2.0: feature updates and expansion of the Antibiotic Resistant  
641 Target Seeker for comparative genome mining. *Nucleic Acids Res* **48**, W546-W552,  
642 doi:10.1093/nar/gkaa374 (2020).
- 643 76 Navarro-Muñoz, J. C. *et al.* A computational framework to explore large-scale biosynthetic  
644 diversity. *Nat Chem Biol* **16**, 60-68, doi:10.1038/s41589-019-0400-9 (2020).
- 645 77 Kautsar, S. A., van der Hooft, J. J. J., de Ridder, D. & Medema, M. H. BiG-SLiCE: A highly scalable  
646 tool maps the diversity of 1.2 million biosynthetic gene clusters. *Gigascience* **10**,  
647 doi:10.1093/gigascience/giaa154 (2021).
- 648 78 Kautsar, S. A., Blin, K., Shaw, S., Weber, T. & Medema, M. H. BiG-FAM: the biosynthetic gene  
649 cluster families database. *Nucleic Acids Res* **49**, D490–D497, doi:10.1093/nar/gkaa812  
650 (2021b).
- 651 79 Li, H. Aligning sequence reads, clone sequences and assembly contigs with BWA-MEM. *arXiv*  
652 *preprint arXiv:1303.3997* (2013).
- 653 80 Li, H. *et al.* The sequence alignment/map format and SAMtools. *Bioinformatics* **25**, 2078-2079  
654 (2009).
- 655 81 Quinlan, A. R. & Hall, I. M. BEDTools: a flexible suite of utilities for comparing genomic  
656 features. *Bioinformatics* **26**, 841-842 (2010).
